# Supplementary material for: Refining DIIS algorithms for Si and GaAs solar cells: incorporation of weight regularization, conjugate gradient, and reverse automatic differentiation techniques
Source: Royal Society of Chemistry journal article supplement (doi:10.1039/d4cp00456f), 2024-01-01
Supplement: d4cp00456f1.pdf [file d4cp00456f1.pdf]

Supporting Information for

**Refining DIIS algorithms for Si and GaAs solar cells: Incorporation of weight  
regularization, conjugate gradient, and reverse automatic differentiation  
techniques**

Zhaosheng Zhang\*, Sijia Liu and Yingjie Zhang

*College of Chemistry and Materials Science, Hebei University, Baoding, 071002, P. R. China*

\*misaraty@163.com

**Table S1** Implementation of the DIIS algorithm in Julia language

---

**DIIS Solver Function**

---

```
function DIIS_Solver(f, x0, max_iter; tol, diis_max_size=5)
    mixing_factor = 1.0 # Set the initial mixing factor
    x = x0 # Initialize the solution with the initial guess
    fx = f(x) # Apply the function to the initial guess
    residuals = [fx - x] # Initialize the list of residuals
    basis = [fx] # Initialize the list of basis functions

    # Iterate up to the maximum number of iterations
    for n = 1:max_iter
        # Break the loop if the latest residual is below the tolerance
        if norm(residuals[end]) < tol
            break
        end

        # DIIS correction when there is more than one residual
        if length(residuals) > 1
            num_res = length(residuals)
            B = zeros(num_res, num_res) # Initialize the B matrix

            # Fill the B matrix with dot products of residuals
            for i = 1:num_res
                for j = 1:num_res
                    B[i, j] = dot(residuals[i], residuals[j])
                end
            end

            rhs = zeros(num_res)
            rhs[end] = -1.0

            # Solve for weights using matrix division
            weights = B \ rhs
            weights ./= sum(weights) # Normalize the weights

            # Update the solution vector x
            x = zeros(size(x0))
            for i = 1:num_res
                x += weights[i] * basis[i]
            end
        end
    end
end
```

---

---

```

    else
        # Simple update if only one residual is present
        x += mixing_factor * residuals[end]
    end

    # Compute the new function value and update residuals and basis
    fx = f(x)
    push!(residuals, fx - x)
    push!(basis, fx)

    # Limit the history size of residuals and basis
    if length(residuals) > diis_max_size
        popfirst!(residuals)
        popfirst!(basis)
    end
end

# Return the final solution and convergence status
return (fixpoint = x, converged = norm(residuals[end]) < tol)
end

```

---

**Table S2** Implementation of the Weighted-DIIS algorithm in Julia language

---

**Weighted-DIIS Solver Function**

---

```
function Weighted-DIIS_Solver(f, x0, max_iter; tol, diis_max_size=5, lambda=1e-6)
    x = x0 # Initialize the solution with the initial guess
    fx = f(x) # Apply the function to the initial guess
    residuals = [fx - x] # Initialize the list of residuals
    basis = [fx] # Initialize the list of basis functions

    # Iterate up to the maximum number of iterations
    for n = 1:max_iter
        # Break the loop if the latest residual is below the tolerance
        if norm(residuals[end]) < tol
            break
        end

        # DIIS correction when there is more than one residual
        if length(residuals) > 1
            num_res = length(residuals)
            B = zeros(num_res, num_res) # Initialize the B matrix

            # Fill the B matrix with dot products of residuals
            for i = 1:num_res
                for j = 1:num_res
                    B[i, j] = dot(residuals[i], residuals[j])
                end
            end

            # Add regularization term to the B matrix
            B += lambda * I

            rhs = zeros(num_res)
            rhs[end] = -1.0

            # Solve for weights using LU decomposition
            weights = B \ rhs
            weights /= sum(weights) # Normalize the weights

            # Update the solution vector x
            x = zeros(size(x0))
            for i = 1:num_res
```

---

---

```

        x += weights[i] * basis[i]
    end
else
    # Simple update if only one residual is present
    x += residuals[end]
end

# Compute the new function value and update residuals and basis
fx = f(x)
push!(residuals, fx - x)
push!(basis, fx)

# Limit the history size of residuals and basis
if length(residuals) > diis_max_size
    popfirst!(residuals)
    popfirst!(basis)
end
end

# Return the final solution and convergence status
return (fixpoint = x, converged = norm(residuals[end]) < tol)
end

```

---

**Table S3** Implementation of the CG-Enhanced algorithm in Julia language

---

**CG-Enhanced Solver Function**

---

using IterativeSolvers # Import the IterativeSolvers package for the conjugate gradient method

```
function CG-Enhanced_Solver(f, x0, max_iter; tol, diis_max_size=5, lambda=1e-6)
```

```
    x = x0 # Initialize the solution with the initial guess
```

```
    fx = f(x) # Apply the function to the initial guess
```

```
    residuals = [fx - x] # Initialize the list of residuals
```

```
    basis = [fx] # Initialize the list of basis functions
```

```
    # Iterate up to the maximum number of iterations
```

```
    for n = 1:max_iter
```

```
        # Break the loop if the latest residual is below the tolerance
```

```
        if norm(residuals[end]) < tol
```

```
            break
```

```
        end
```

```
        # DIIS correction when there is more than one residual
```

```
        if length(residuals) > 1
```

```
            num_res = length(residuals)
```

```
            B = zeros(num_res, num_res) # Initialize the B matrix
```

```
            # Fill the B matrix with dot products of residuals
```

```
            for i = 1:num_res
```

```
                for j = 1:num_res
```

```
                    B[i, j] = dot(residuals[i], residuals[j])
```

```
                end
```

```
            end
```

```
            # Add regularization term to the B matrix
```

```
            B += lambda * I
```

```
            rhs = zeros(num_res)
```

```
            rhs[end] = -1.0
```

```
            # Solve for weights using the conjugate gradient method
```

```
            weights = cg(B, rhs)
```

```
            weights ./= sum(weights) # Normalize the weights
```

```
            # Update the solution vector x
```

---

---

```

        x = zeros(size(x0))
        for i = 1:num_res
            x += weights[i] * basis[i]
        end
    else
        # Simple update if only one residual is present
        x += residuals[end]
    end

    # Compute the new function value and update residuals and basis
    fx = f(x)
    push!(residuals, fx - x)
    push!(basis, fx)

    # Limit the history size of residuals and basis
    if length(residuals) > diis_max_size
        popfirst!(residuals)
        popfirst!(basis)
    end
end

# Return the final solution and convergence status
return (fixpoint = x, converged = norm(residuals[end]) < tol)
end

```

---

**Table S4** Implementation of the Jacobian-ReverseDiff algorithm in Julia language

---

**Jacobian-ReverseDiff Solver Function**

---

using ReverseDiff # Using ReverseDiff for automatic differentiation

```
function Jacobian_ReverseDiff_Solver(f, x0, max_iter; tol, diis_max_size=5, lambda=1e-6)
    x = x0 # Initialize the solution with the initial guess
    fx = f(x) # Apply the function to the initial guess
    residuals = [fx - x] # Initialize the list of residuals
    basis = [fx] # Initialize the list of basis functions

    # Iterate up to the maximum number of iterations
    for n = 1:max_iter
        # Break the loop if the latest residual is below the tolerance
        if norm(residuals[end]) < tol
            break
        end

        # DIIS correction when more than one residual is available
        if length(residuals) > 1
            num_res = length(residuals)
            B = zeros(num_res, num_res) # Initialize the B matrix

            # Fill the B matrix with dot products of residuals
            for i = 1:num_res
                for j = 1:num_res
                    B[i, j] = dot(residuals[i], residuals[j])
                end
            end

            B += lambda * I # Add regularization term

            rhs = zeros(num_res)
            rhs[end] = -1.0

            # Calculate weights using Jacobian matrix from ReverseDiff
            weights = ReverseDiff.jacobian((w) -> B * w - rhs, zeros(num_res)) \ rhs
            weights /= sum(weights) # Normalize the weights

            # Update the solution vector x
            x = zeros(size(x0))
```

---



---

```

        for i = 1:num_res
            x += weights[i] * basis[i]
        end
    else
        # Simple update if only one residual is present
        x += residuals[end]
    end

    # Compute the new function value and update residuals and basis
    fx = f(x)
    push!(residuals, fx - x)
    push!(basis, fx)

    # Limit the history size of residuals and basis
    if length(residuals) > diis_max_size
        popfirst!(residuals)
        popfirst!(basis)
    end
end

# Return the final solution and convergence status
return (fixpoint = x, converged = norm(residuals[end]) < tol)
end

```

---

**Table S5** Implementation of the Gradient-ReverseDiff algorithm in Julia language

---

**Gradient-ReverseDiff Solver Function**

---

```
using ReverseDiff # Using ReverseDiff for automatic differentiation

# Gradient-ReverseDiff Solver Function
function Gradient_ReverseDiff_Solver(f, x0, max_iter; tol, diis_max_size=5, lambda=1e-6)
    x = x0 # Initialize the solution with the initial guess
    fx = f(x) # Apply the function to the initial guess
    residuals = [fx - x] # Initialize the list of residuals
    basis = [fx] # Initialize the list of basis functions

    # Iterate up to the maximum number of iterations
    for n = 1:max_iter
        # Break the loop if the latest residual is below the tolerance
        if norm(residuals[end]) < tol
            break
        end

        # DIIS correction when more than one residual is available
        if length(residuals) > 1
            num_res = length(residuals)
            B = zeros(num_res, num_res) # Initialize the B matrix

            # Fill the B matrix with dot products of residuals
            for i = 1:num_res
                for j = 1:num_res
                    B[i, j] = dot(residuals[i], residuals[j])
                end
            end

            B += lambda * I # Add regularization term

            rhs = zeros(num_res)
            rhs[end] = -1.0

            # Calculate weights using gradient function from ReverseDiff
            weights = ReverseDiff.gradient(w -> sum(w .* (B * w - rhs)), zeros(size(rhs)))
            weights /= sum(weights) # Normalize the weights

            # Update the solution vector x

```

---

---

```

        x = zeros(size(x0))
        for i = 1:num_res
            x += weights[i] * basis[i]
        end
    else
        # Simple update if only one residual is present
        x += residuals[end]
    end

    # Compute the new function value and update residuals and basis
    fx = f(x)
    push!(residuals, fx - x)
    push!(basis, fx)

    # Limit the history size of residuals and basis
    if length(residuals) > diis_max_size
        popfirst!(residuals)
        popfirst!(basis)
    end
end

# Return the final solution and convergence status
return (fixpoint = x, converged = norm(residuals[end]) < tol)
end

```

---

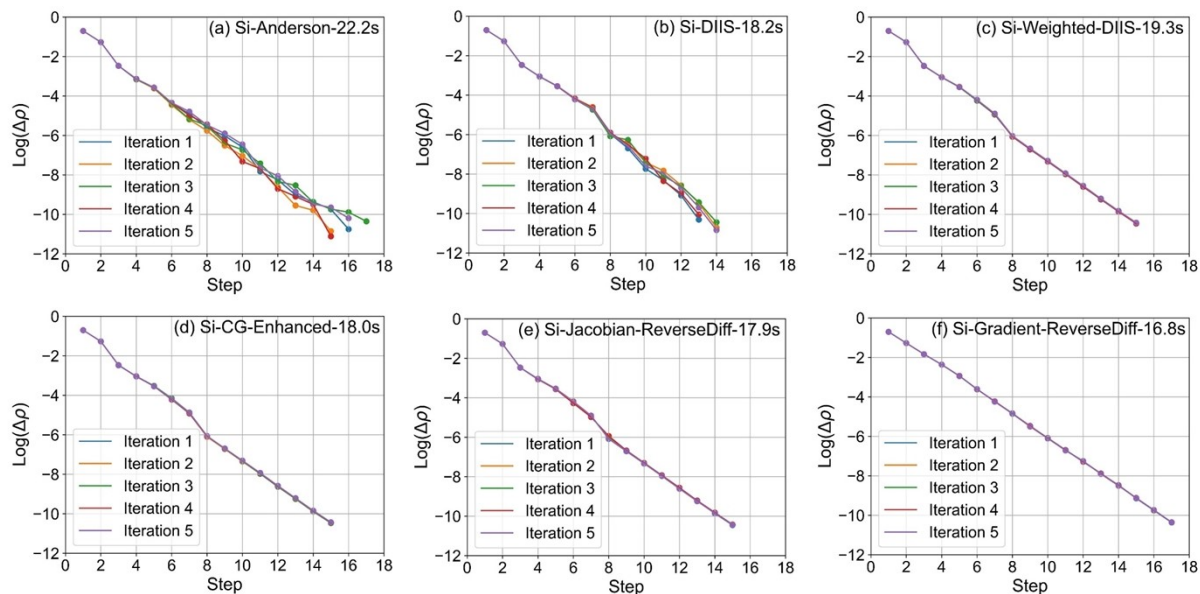

**Fig. S1** Electronic minimization algorithm performance in SCF iterations for Si under Ecut15 condition specified in Table 1. The algorithms include (a) Anderson, (b) DIIS, (c) Weighted-DIIS, (d) CG-Enhanced, (e) Jacobian-ReverseDiff, and (f) Gradient-ReverseDiff, offering insights into their relative effectiveness and efficiency in the SCF process.

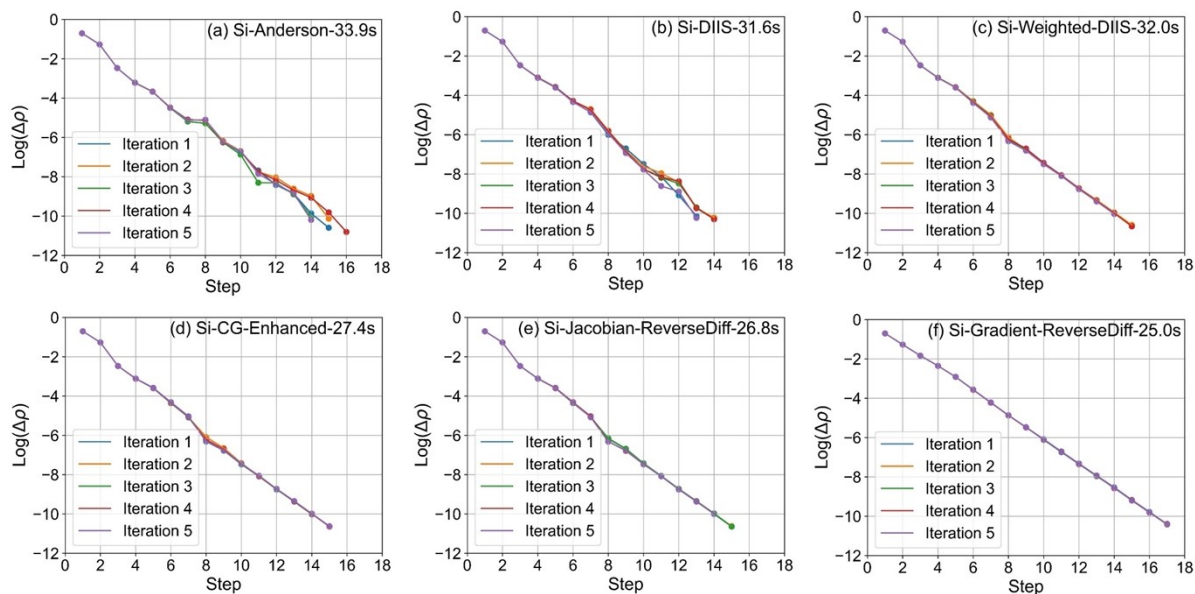

**Fig. S2** Electronic minimization algorithm performance in SCF iterations for Si under Ecut25 condition specified in Table 1. The algorithms include (a) Anderson, (b) DIIS, (c) Weighted-DIIS, (d) CG-Enhanced, (e) Jacobian-ReverseDiff, and (f) Gradient-ReverseDiff, offering insights into their relative effectiveness and efficiency in the SCF process.

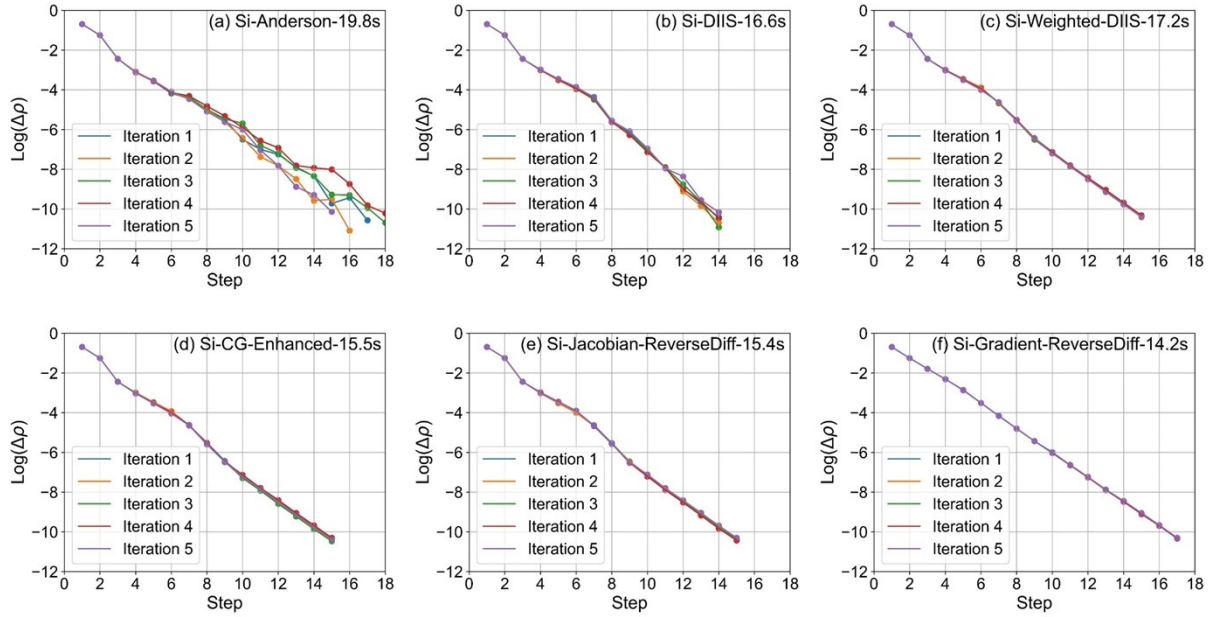

**Fig. S3** Electronic minimization algorithm performance in SCF iterations for Si under K555 condition specified in Table 1. The algorithms include (a) Anderson, (b) DIIS, (c) Weighted-DIIS, (d) CG-Enhanced, (e) Jacobian-ReverseDiff, and (f) Gradient-ReverseDiff, offering insights into their relative effectiveness and efficiency in the SCF process.

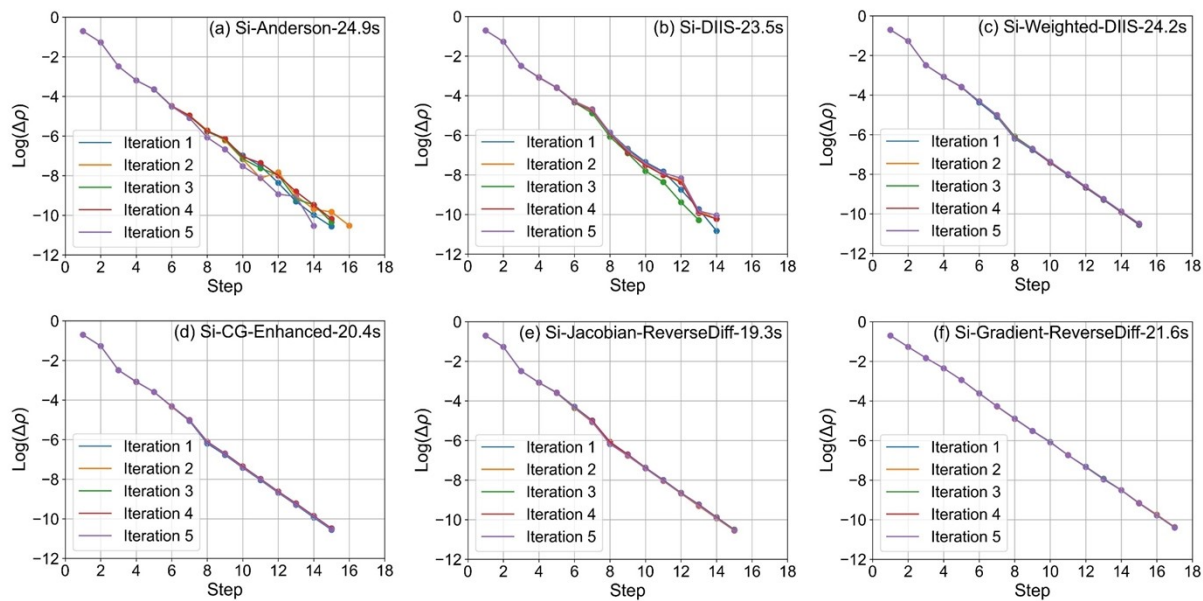

**Fig. S4** Electronic minimization algorithm performance in SCF iterations for Si under 777 condition specified in Table 1. The algorithms include (a) Anderson, (b) DIIS, (c) Weighted-DIIS, (d) CG-Enhanced, (e) Jacobian-ReverseDiff, and (f) Gradient-ReverseDiff, offering insights into their relative effectiveness and efficiency in the SCF process.

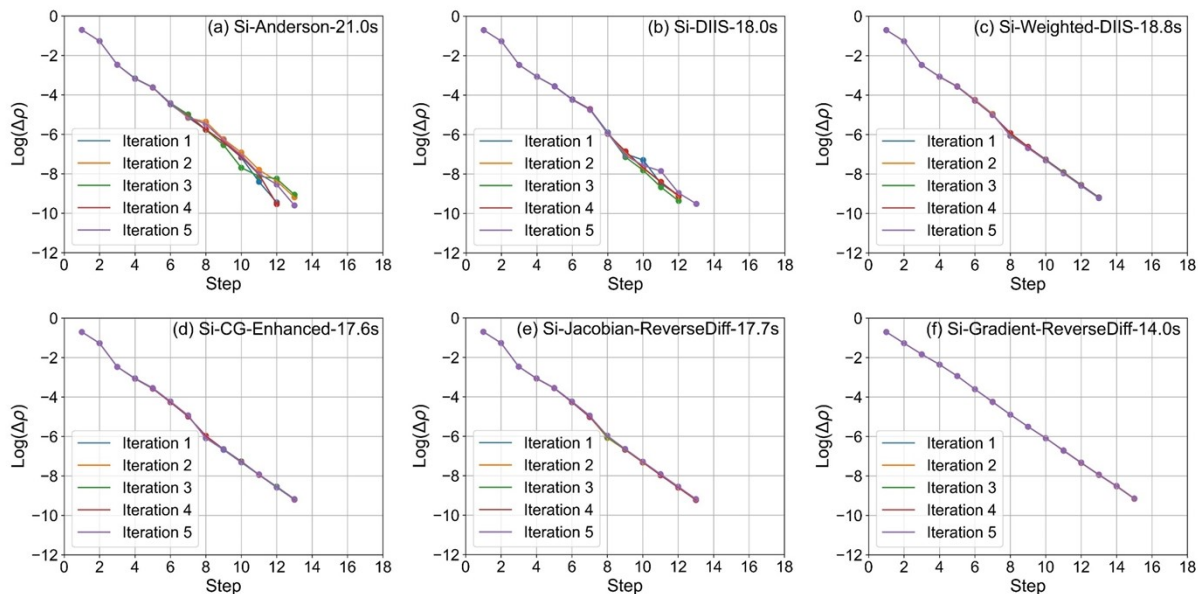

**Fig. S5** Electronic minimization algorithm performance in SCF iterations for Si under Tol-9 condition specified in Table 1. The algorithms include (a) Anderson, (b) DIIS, (c) Weighted-DIIS, (d) CG-Enhanced, (e) Jacobian-ReverseDiff, and (f) Gradient-ReverseDiff, offering insights into their relative effectiveness and efficiency in the SCF process.



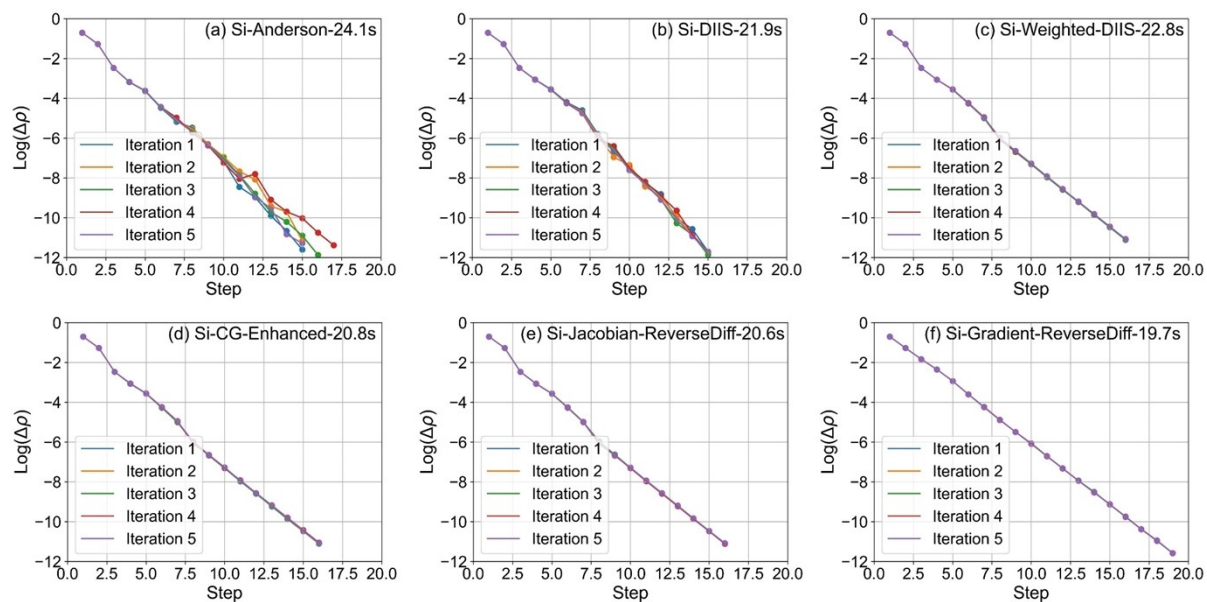

**Fig. S6** Electronic minimization algorithm performance in SCF iterations for Si under Tol-11 condition specified in Table 1. The algorithms include (a) Anderson, (b) DIIS, (c) Weighted-DIIS, (d) CG-Enhanced, (e) Jacobian-ReverseDiff, and (f) Gradient-ReverseDiff, offering insights into their relative effectiveness and efficiency in the SCF process.

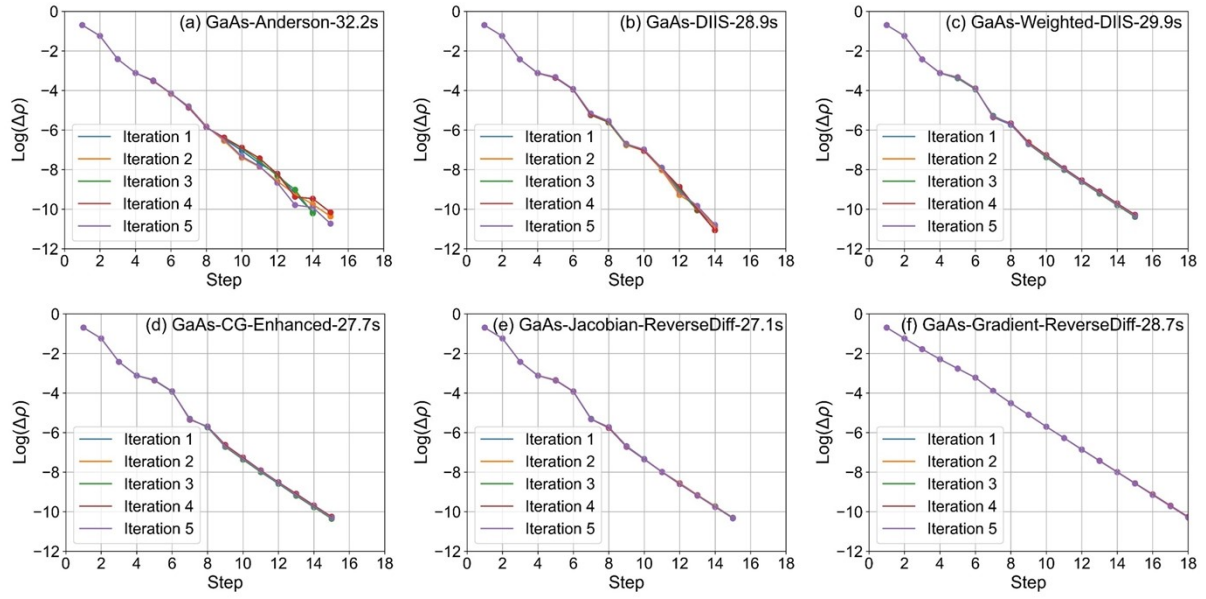

**Fig. S7** Electronic minimization algorithm performance in SCF iterations for GaAs under Ecut15 condition specified in Table 1. The algorithms include (a) Anderson, (b) DIIS, (c) Weighted-DIIS, (d) CG-Enhanced, (e) Jacobian-ReverseDiff, and (f) Gradient-ReverseDiff, offering insights into their relative effectiveness and efficiency in the SCF process.

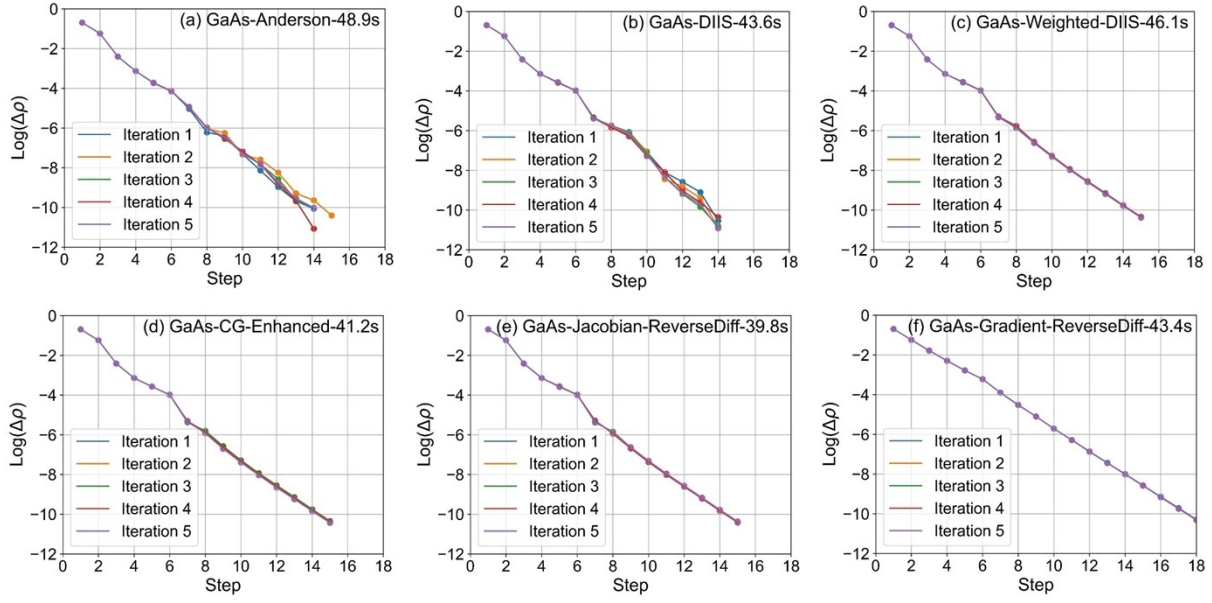

**Fig. S8** Electronic minimization algorithm performance in SCF iterations for GaAs under Ecut25 condition specified in Table 1. The algorithms include (a) Anderson, (b) DIIS, (c) Weighted-DIIS, (d) CG-Enhanced, (e) Jacobian-ReverseDiff, and (f) Gradient-ReverseDiff, offering insights into their relative effectiveness and efficiency in the SCF process.

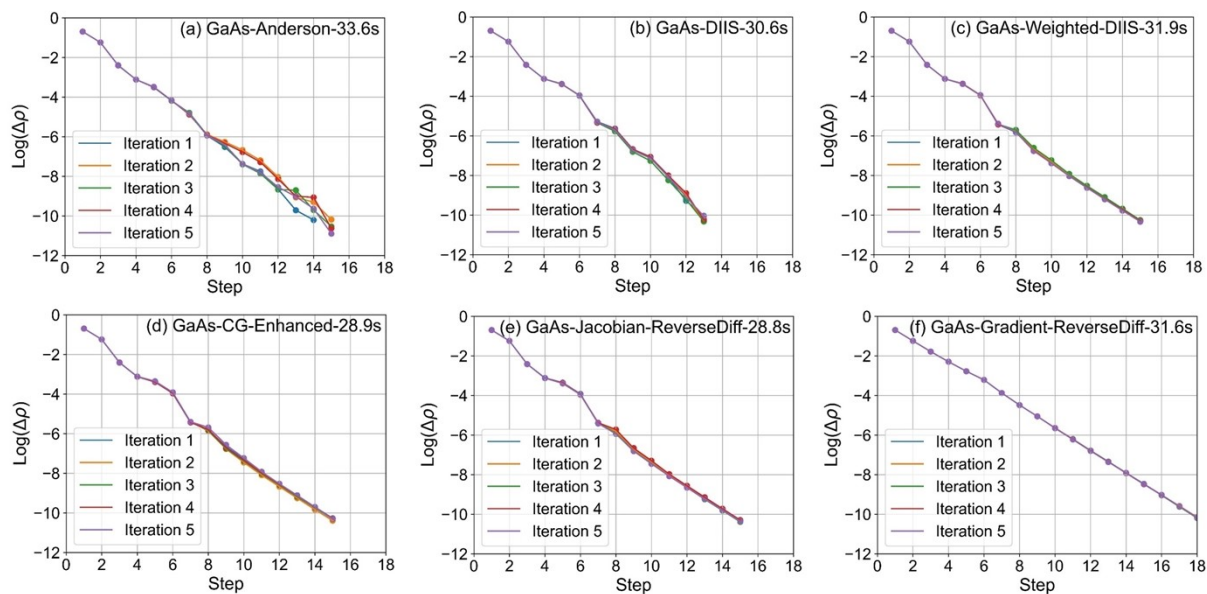

**Fig. S9** Electronic minimization algorithm performance in SCF iterations for GaAs under K555 condition specified in Table 1. The algorithms include (a) Anderson, (b) DIIS, (c) Weighted-DIIS, (d) CG-Enhanced, (e) Jacobian-ReverseDiff, and (f) Gradient-ReverseDiff, offering insights into their relative effectiveness and efficiency in the SCF process.

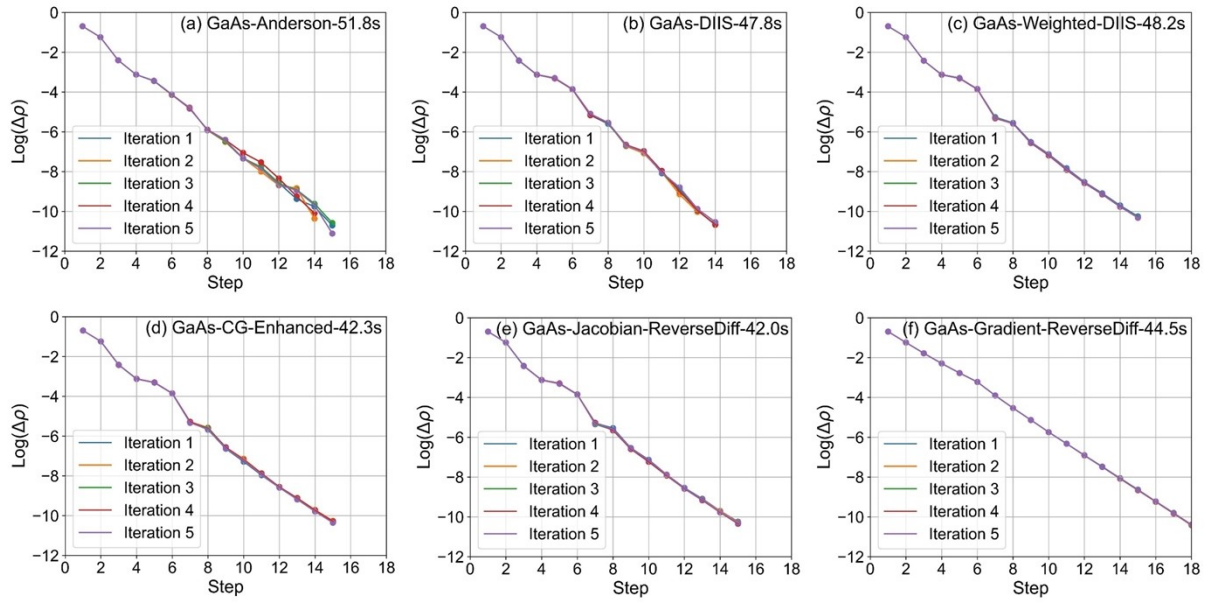

**Fig. S10** Electronic minimization algorithm performance in SCF iterations for GaAs under K777 condition specified in Table 1. The algorithms include (a) Anderson, (b) DIIS, (c) Weighted-DIIS, (d) CG-Enhanced, (e) Jacobian-ReverseDiff, and (f) Gradient-ReverseDiff, offering insights into their relative effectiveness and efficiency in the SCF process.

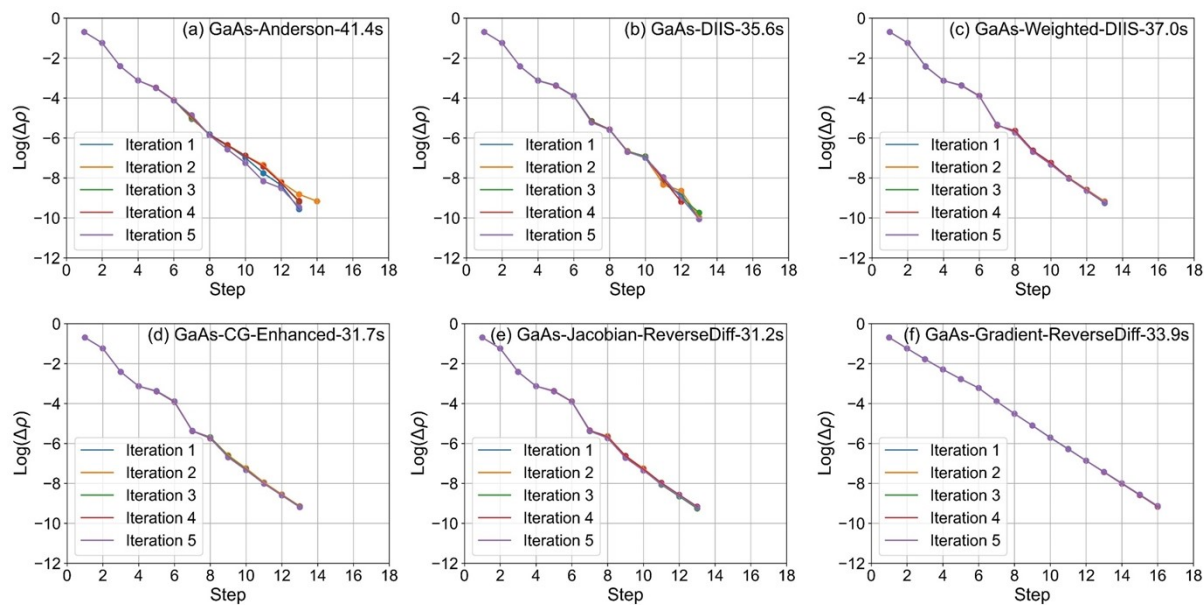

**Fig. S11** Electronic minimization algorithm performance in SCF iterations for GaAs under Tol-9 condition specified in Table 1. The algorithms include (a) Anderson, (b) DIIS, (c) Weighted-DIIS, (d) CG-Enhanced, (e) Jacobian-ReverseDiff, and (f) Gradient-ReverseDiff, offering insights into their relative effectiveness and efficiency in the SCF process.

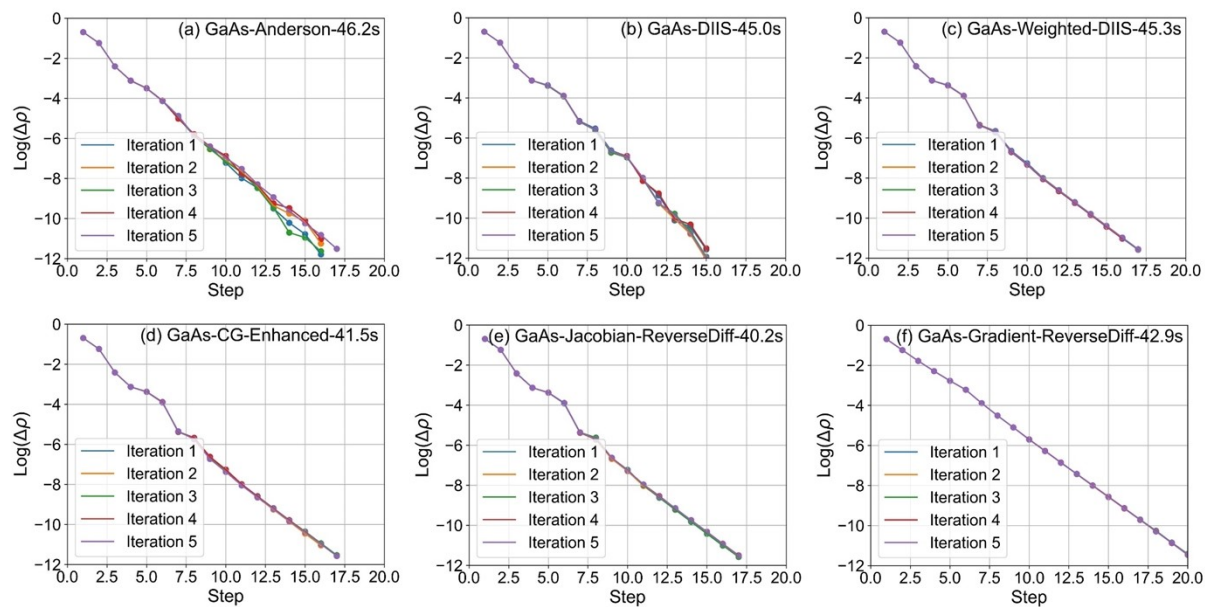

**Fig. S12** Electronic minimization algorithm performance in SCF iterations for GaAs under Tol-11 condition specified in Table 1. The algorithms include (a) Anderson, (b) DIIS, (c) Weighted-DIIS, (d) CG-Enhanced, (e) Jacobian-ReverseDiff, and (f) Gradient-ReverseDiff, offering insights into their relative effectiveness and efficiency in the SCF process.
